# Supplementary material for: Fingerprinting seamless single-walled carbon nanotube junctions via the migration of encapsulated N2molecules from bottom to top: are arrays of VA-SWNTs continuous?
Source: Royal Society of Chemistry journal article supplement (doi:10.1039/c6nr09901g), 2017-01-01
Supplement: c6nr09901g1.pdf [file c6nr09901g1.pdf]

## Electronic Supplementary Information (ESI)

# **Fingerprinting seamless single-walled carbon nanotube junctions via the migration of encapsulated N<sub>2</sub> molecules from bottom to top: are arrays of VA-SWNTs continuous?**

Theerapol Thurakitseree,<sup>\*a</sup> Christian Kramberger,<sup>b</sup> Pisith Singjai,<sup>c</sup> Shigeo Maruyama<sup>\*d,e</sup>

<sup>a</sup>Program in Applied Physics, Faculty of Science, Maejo University, Chiang Mai, Thailand, <sup>b</sup>Research Group Physics of Nanostructured Materials, Faculty of Physics, University of Vienna, Vienna, Austria, <sup>c</sup>Chiang Mai University, Chiang Mai, Thailand, <sup>d</sup>Department of Physics and Materials Science, Faculty of Science, University of Tokyo, Tokyo, Japan, <sup>e</sup>Department of Mechanical Engineering, School of Engineering, National Institute of Advanced Industrial Science and Technology, Tsukuba, Japan

\*Corresponding Author: theerapol@mju.ac.th, maruyama@photon.t.u-tokyo.ac.jp

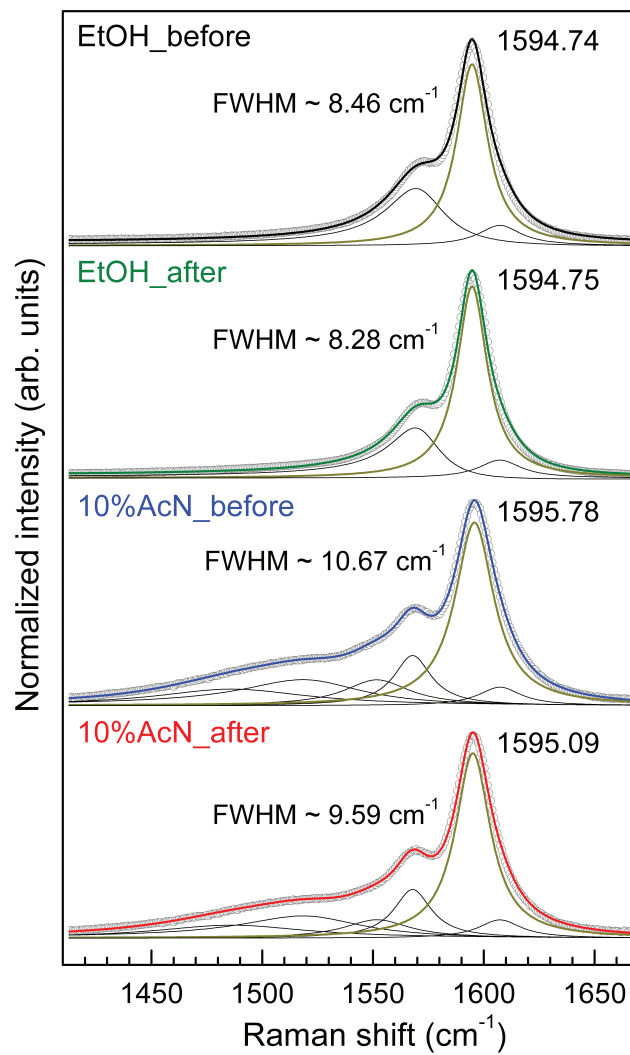

**Fig. S1** High frequency G-band spectra of SWNTs before and after removing nanotube cap and annealing. Diminishing in G-band linewidth is due to absence of coulomb interaction from encapsulated N<sub>2</sub> molecules.
